# Supplementary material for: Outcomes of a Hybrid Ophthalmology Telemedicine Model for Outpatient Eye Care During COVID-19
Source: PubMed Central journal article supplement (PMC9412225; doi:10.1001/jamanetworkopen.2022.26292), 2022-08-25
Supplement: jamanetwopen-e2226292-s001.pdf [file jamanetwopen-e2226292-s001.pdf]

## Supplemental Online Content

Sanayei N, Albrecht MM, Martin DC, et al. Outcomes of a hybrid ophthalmology telemedicine model for outpatient eye care during COVID-19. *JAMA Netw Open*. 2022;5(8):e2226292. doi:10.1001/jamanetworkopen.2022.26292

**eTable 1.** Comparison Between the Standard of Care In-Person Visit With Different Forms of Telemedicine

**eTable 2.** Imaging Protocols by Chief Concern

This supplemental material has been provided by the authors to give readers additional information about their work.

**eTable 1. Comparison between the standard of care in-person visit with different forms of telemedicine. The hybrid model can mimic all aspects of an in-person visit unlike other telemedicine models.**

|                      | Standard in-Person | Hybrid  | Telephone | Video | Store-and-Forward |
|----------------------|--------------------|---------|-----------|-------|-------------------|
| Medical History      | ✓                  | ✓       | ✓         | ✓     |                   |
| Ocular Vitals        | ✓                  | Limited |           |       | Limited           |
| Physical Examination | ✓                  | Proxy   |           | Proxy | Proxy             |
| Testing              | ✓                  | ✓       |           |       | ✓                 |
| Management           | ✓                  | ✓       | ✓         | ✓     | ✓                 |

**eTable 2. Imaging protocols by chief complaint**

| <b>Hybrid Imaging Protocols</b>                                         |                                                           |
|-------------------------------------------------------------------------|-----------------------------------------------------------|
| Glaucoma Suspect<br>(Glaucoma,<br>Comprehensive,<br>Optometry Services) | 1. VA with and without pinhole                            |
|                                                                         | 2. Automated refraction                                   |
|                                                                         | 3. IOP by two different methods (applanation and tonopen) |
|                                                                         | 4. HVF 24-2                                               |
|                                                                         | 5. OCT RNFL                                               |
| Retina                                                                  | 1. VA with and without pinhole                            |
|                                                                         | 2. IOP by tonopen                                         |
|                                                                         | 3. Ultrawidefield fundus photographs                      |
|                                                                         | 4. Ultrawidefield fundus autofluorescence                 |
|                                                                         | 5. OCT macula                                             |
| Keratoconus<br>(Cornea Service)                                         | 1. VA with and without pinhole                            |
|                                                                         | 2. Automated refraction                                   |
|                                                                         | 3. Automated keratometry                                  |
|                                                                         | 4. Topography                                             |
| Neuro-ophthalmology                                                     | 1. VA with and without pinhole                            |
|                                                                         | 2. IOP                                                    |
|                                                                         | 3. Color plates                                           |
|                                                                         | 4. OCT RNFL/GCL                                           |
|                                                                         | 5. Optic nerve photographs                                |

GCL: ganglion cell layer, HVF: Humphrey visual field, IOP: intraocular pressure, OCT: optical coherence tomography, RNFL: retinal nerve fiber layer, VA: visual acuity
